# Supplementary material for: Physical Surface Modification of Carbon-Nanotube/Polydimethylsiloxane Composite Electrodes for High-Sensitivity DNA Detection
Source: MDPI journal article supplement (doi:10.3390/nano11102661), 2021-10-10
Supplement: s1 [file s1]

# Physical Surface Modification of Carbon Nanotube/Polymer Electrodes for High-Sensitivity DNA Detection

Junga Moon <sup>1,3</sup>, Huaide Jiang <sup>1,3</sup> and Eun-Cheol Lee <sup>1,2,3,\*</sup>

<sup>1</sup> Department of Nano Science and Technology, Graduate School, Gachon University, Gyeonggi 13120, Republic of Korea; mka3202@naver.com (J.M.); huaide20@gmail.com (H.J.)

<sup>2</sup> Department of Physics, Gachon University, Gyeonggi 13120, Republic of Korea

<sup>3</sup> Gachon Bio-Nano Research Institute, Gachon University, Gyeonggi 13120, Republic of Korea

\* Correspondence: ecleel@gachon.ac.kr; Tel.: +82 31 750 8752

## 1. Preparation of the F-MWCNT/MWCNT/PDMS electrode

16 mg of MWCNT powder was dispersed in 20 mL anhydrous IPA through tip sonication for 1 h. The process for forming MWCNT layer on a petri dish with a diameter of 9 cm consisted of three cycles of casting and drying the solution. During the first cycle, 10 mL of the MWCNT solution was placed onto a petri dish and dried at 95 °C. During the second and the third cycles, 5 mL of the solution was casted and dried. 11 g of PDMS was prepared by mixing an elastomer and curing agent in a weight ratio of 10:1 and air bubbles in PDMS were removed using a vacuum pump. Then, PDMS was poured onto the dry MWCNT layer and was covered the glass substrate on MWCNT/PDMS layer at 95 °C for 10 h. After that, MWCNT/PDMS/glass was detached off from petri dish and then the MWCNT/PDMS layer was also peeled off from the glass. The MWCNT/PDMS film was cut to 15 mm × 5 mm dimension and cleaned by sonicating it in absolute ethanol and de-ionized water for 3 min and 2 min, respectively.

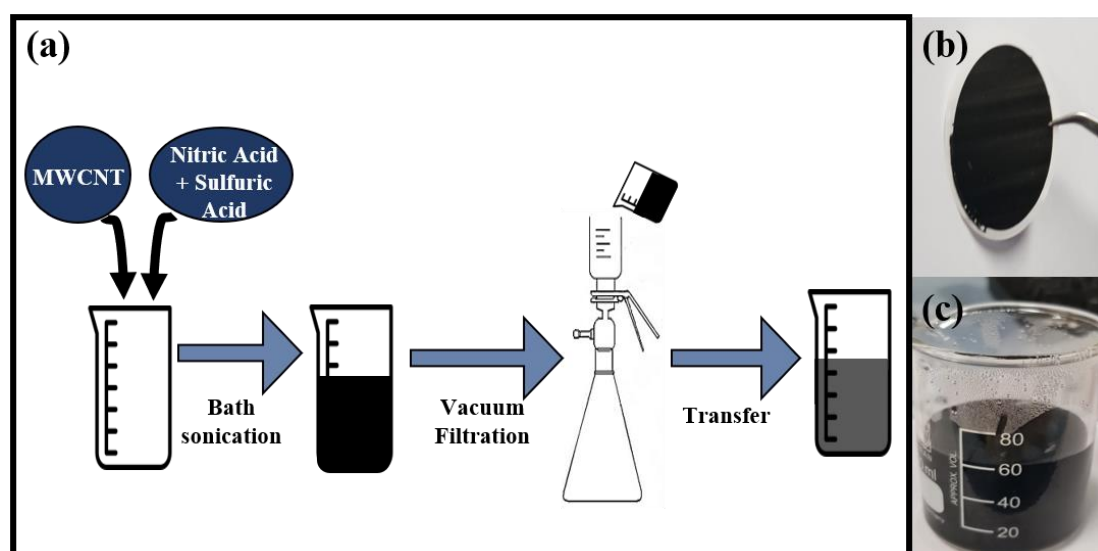

**Figure S1.** (a) Fabrication process for the functionalized MWCNT (MWCNT-COOH) (b) Membrane filter remaining after processing by vacuum filtration and (c) after sonicating with DI water.

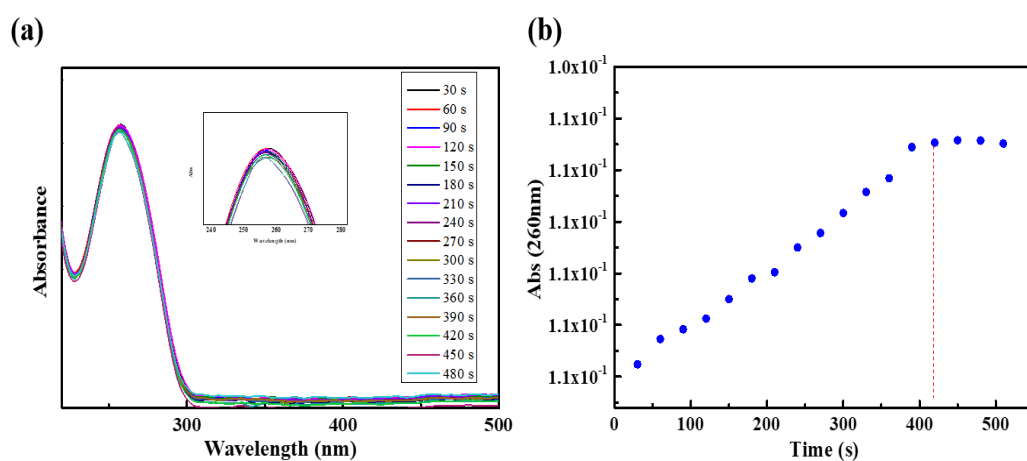

**Figure S2.** Determination of hybridization time. (a) Sixteen UV absorption curves measured every 30 s for 480 s. (b) Absorbance at a wavelength of 260 nm as a function of time.

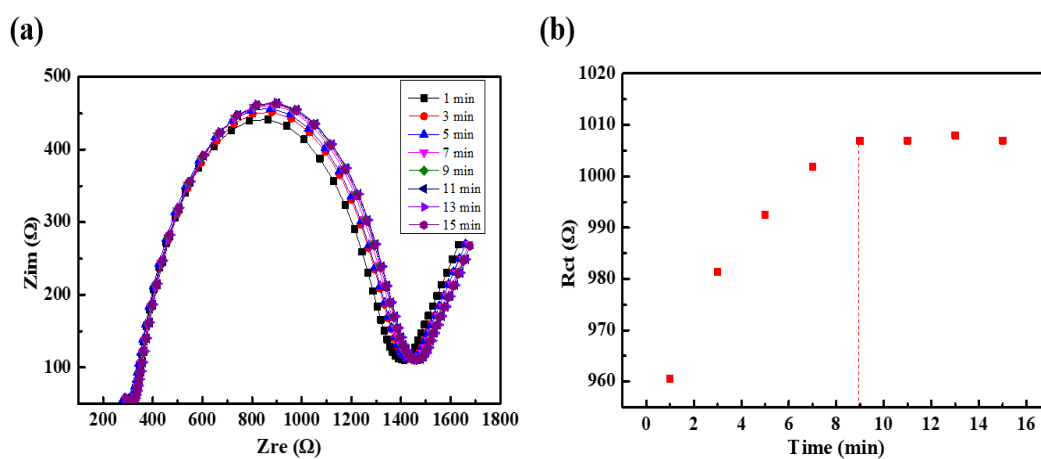

**Figure S3.** (a) Nyquist plot for the different accumulation times at 0.26 V from 1 min to 15 min. (b)  $R_{ct}$  value as a function of time. The sample PBS solutions contained 1 nM probe DNA and 4 mM  $[\text{Fe}(\text{CN})_6]^{3-/4-}$ .

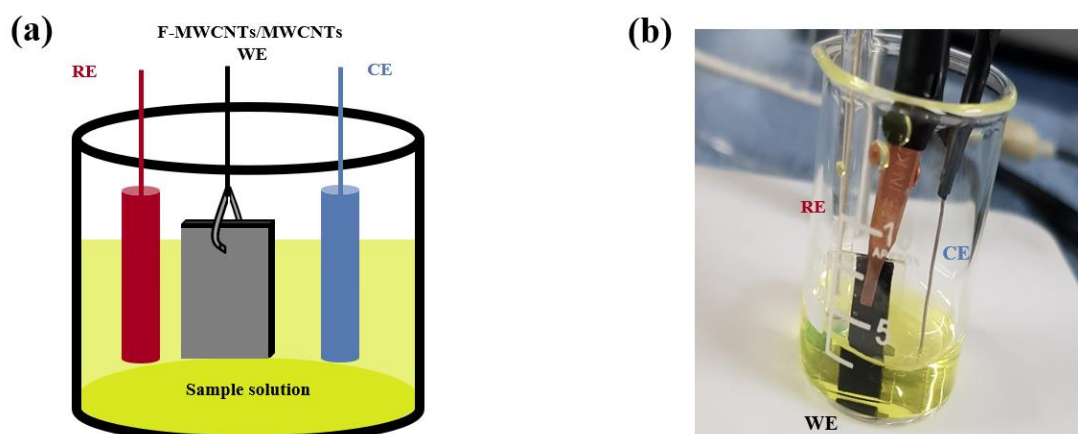

**Figure S4.** (a) Schematic and (b) image showing the integration of the three electrodes platform.

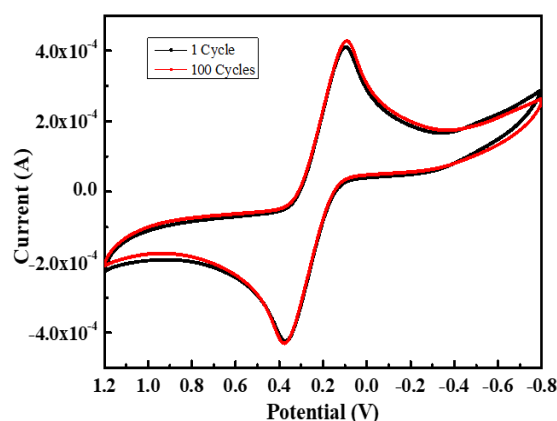

**Figure S5.** Cyclic voltammetry responses of the F-MWCNT/MWCNT/PDMS electrode after 1 cycle (black line) and after 100 cycles (red line). The electrode was immersed in PBS solution containing 4 mM  $[\text{Fe}(\text{CN})_6]^{3-/4-}$ .

**Table S1.** Comparison of the electrode performance with other electrochemical DNA biosensors based on EIS.

| Working electrode                                                                                    | LOD     | Linear range (M)                              | References |
|------------------------------------------------------------------------------------------------------|---------|-----------------------------------------------|------------|
| GCE/AuNPs-ATP functionalized graphene oxide (ATP-GO)                                                 | 11.3 fM | $1.0 \times 10^{-13}$ to $1.0 \times 10^{-9}$ | [1]        |
| GCE/electrochemically reduced graphene oxide (ERGO)                                                  | 30 pM   | $1.0 \times 10^{-12}$ to $1.0 \times 10^{-9}$ | [2]        |
| GCE/polyaniline-mesoporous nanozirconia composite (PAN-nanoZrO <sub>2</sub> )/Poly L-tyrosine (PTyr) | 26.8 fM | $1.0 \times 10^{-13}$ to $1.0 \times 10^{-6}$ | [3]        |
| Carbon paste electrode/nanogold-CNT/polyaniline nanofibers (PAN <sub>nano</sub> ) films              | 0.56 pM | $1.0 \times 10^{-12}$ to $1.0 \times 10^{-6}$ | [4]        |
| GCE/SWCNTs/ZrO <sub>2</sub> /2,6-pyridinedicarboxylic acid (PDC)                                     | 1.38 pM | $1.0 \times 10^{-11}$ to $1.0 \times 10^{-6}$ | [5]        |
| Au electrode/AuNPs                                                                                   | 0.67 pM | $2.0 \times 10^{-12}$ to $9.0 \times 10^{-8}$ | [6]        |
| F-MWCNT/MWCNT/PDMS composite electrode                                                               | 19.9 fM | $1.0 \times 10^{-12}$ to $1.0 \times 10^{-9}$ | This work  |

## References

- Gupta, V.K.; Yola, M.L.; Qureshi, M.S.; Solak, A.O.; Atar, N.; Üstündağ, Z. A novel impedimetric biosensor based on graphene oxide/gold nanoplatfrom for detection of DNA arrays. *Sensors Actuators, B Chem.* **2013**, *188*, 1201–1211, doi:10.1016/j.snb.2013.08.034.
- Gong, Q.; Yang, H.; Dong, Y.; Zhang, W. A sensitive impedimetric DNA biosensor for the determination of the HIV gene based on electrochemically reduced graphene oxide. *Anal. Methods* **2015**, *7*, 2554–2562, doi:10.1039/c5ay00111k.
- Yang, J.; Wang, X.; Shi, H. An electrochemical DNA biosensor for highly sensitive detection of phosphinothricin acetyltransferase gene sequence based on polyaniline- (mesoporous nanozirconia)/poly-tyrosine film. *Sensors Actuators, B Chem.* **2012**, *162*, 178–183, doi:10.1016/j.snb.2011.12.064.
- Zhou, N.; Yang, T.; Jiang, C.; Du, M.; Jiao, K. Highly sensitive electrochemical impedance spectroscopic detection of DNA hybridization based on Aunanano-CNT/PANnano films. *Talanta* **2009**, *77*, 1021–1026, doi:10.1016/j.talanta.2008.07.058.
- Yang, J.; Jiao, K.; Yang, T. A DNA electrochemical sensor prepared by electrodepositing zirconia on composite films of single-walled carbon nanotubes and poly(2,6- pyridinedicarboxylic acid), and its application to detection of the PAT gene fragment. *Anal. Bioanal. Chem.* **2007**, doi:10.1007/s00216-007-1450-5.
- Zhang, K.; Ma, H.; Zhang, L.; Zhang, Y. Fabrication of a sensitive impedance biosensor of DNA hybridization based on gold nanoparticles modified gold electrode. *Electroanalysis* **2008**, *20*, 2127–2133, doi:10.1002/elan.200804290.
